# Supplementary material
Source: PubMed Central journal article supplement (PMC3325786)
Supplement: NIHMS344622-supplement-1.pdf [file NIHMS344622-supplement-1.pdf]

## **Supplementary Data**

### **Supplementary Materials and Methods**

#### **Animal Studies**

For pIpC injections, baseline labs were drawn when mice reached 6 weeks of age. Treatment with pIpC (1 mg/mL in PBS; Amersham/Pharmacia) was initiated on 7 week-old mice. Mice were treated every other day with a total of 5 intraperitoneal injections (20mg/kg). At 16 weeks post-treatment, mice were sacrificed. Peripheral blood, spleen, thymus, and bone marrow were harvested and analyzed. PCR genotyping of Taspase1 has been described. MMTV-neu and MMTV-wnt mice were treated intravenously with NSC48300 or vehicle (30% propylene glycol and 5% Tween-80 in D5W, pH 4.65). Tumors were measured in two dimensions and volume was calculated as described (1). U251 glioblastoma cells transduced with GFP-luciferase expressing retroviruses were selected for 3 days in puromycin (1.5 $\mu$ g/mL). Cells were then harvested and resuspended in RPMI 1640 in a 2:1 ratio with growth factor reduced Matrigel (BD Biosciences, San Jose, CA). One million cells were engrafted into each flank of male NOD-*scid* *IL2R $\gamma$* <sup>-/-</sup> mice (Jackson Lab) between 6-8 weeks of age. NSC48300 was administered every other day starting 1 day after implantation.

#### **Compounds**

The NCI Diversity Set was kindly provided by the NCI DTP. NSC48300 analogues were provided by the NCI DTP. The Ac-ISQLD-cmk and Ac-ISQLD-aldehyde were generated by the Peptides International (Louisville, KY) and Anaspec (Freemont, CA), respectively. All compounds were dissolved in DMSO. Arsenic acid sodium salt was purchased from MP Biomedicals (Solon, OH).

## **IVTT-based and FRET-based in vitro cleavage assays**

The IVTT-based in vitro cleavage assays were performed as previously described (2). To assess the enzymatic activity of Taspase1, a FRET-based proteolytic reporter (FRPR) was generated (Tufts University Core Facility, Boston, MA). Reactions were conducted in reaction buffer (100mM HEPES, pH 7.9, 10% sucrose, 1mM DTT). To study inhibitors, rTaspase1 was pre-incubated with the indicated compounds for 30 minutes at room temperature. To initiate cleavage reaction, FRPR was added (final concentration at 15 $\mu$ M). Taspase1 activity was monitored by recording the accumulated, emitted fluorescence signal ( $\lambda_{\text{excitation}} = 328\text{nm}$ , slit = 10nm and  $\lambda_{\text{emission}} = 393\text{nm}$ , slit = 10nm) over time. Assays were performed with an LS55 (Perkin Elmer, Inc., Waltham, MA) fluorescence spectrometer in a 96-well plate format. Steady state rates were determined for each reaction.  $K_M$  and  $K_I$  were determined using Prism software (GraphPad Software, Inc., La Jolla, CA), assuming Michaelis-Menten kinetics.

## **Toxicity studies**

Male C57/B16 mice, 6-8 weeks old, were treated with vehicle or NSC48300 at 2.5mg/kg every other day for a total of 5 intravenous doses. Mice were sacrificed for tissue and blood harvest one day after the last treatment. Tissues were subjected histological examination. CBC and serum chemistry were analyzed by Hemavet and Research Animal Diagnostic Lab (Washington University School of Medicine), respectively.

## **References:**

1. Chen DY, Liu H, Takeda S, Tu HC, Sasagawa S, Van Tine BA, et al. Taspase1 functions as a non-oncogene addiction protease that coordinates cancer cell proliferation and apoptosis. *Cancer Res.* 2010;70:5358-67.
2. Hsieh JJ, Cheng EH, Korsmeyer SJ. Taspase1: a threonine aspartase required for cleavage of MLL and proper HOX gene expression. *Cell.* 2003;115:293-303.

## Supplementary Figures and Tables

**Figure S1.** The inhibition of Taspase1 by ISQLD peptidomimetics and Bortezomib. A, Ac-KISQLD-aldehyde and Ac-ISQLD-cmk have minimal activity against Taspase1. rTaspase1 was incubated with the indicated concentrations of either Ac-KISQLD-aldehyde (top) or Ac-ISQLD-cmk (bottom) for 30 minutes at room temperature. The IVTT, <sup>35</sup>S-methionine labeled, p75MLL cleavage reporter was then added to the enzyme (5ng rTaspase1)/inhibitor mix for 30 minutes at 30°C. The resulting cleavage of p75MLL was resolved by SDS-PAGE and monitored by autoradiography. B, Bortezomib has no activity against Taspase1. rTaspase1 was incubated with the indicated concentrations of Bortezomib for 30 minutes at room temperature. The IVTT, <sup>35</sup>S-methionine labeled, p75MLL cleavage reporter was then added to the enzyme (5ng rTaspase1)/Bortezomib mix for 30 minutes at 30°C. The resulting cleavage was analyzed as described in A.

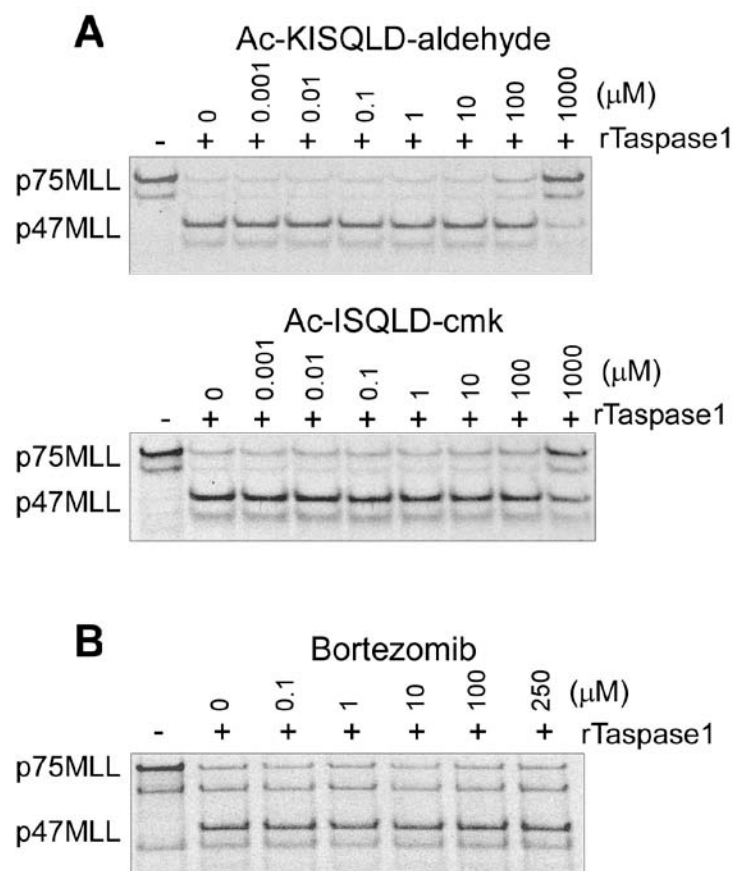

Figure S1

**Figure S2.** Optimization of rCaspase8-mediated in vitro cleavage of p22Bid. The indicated amounts of rCaspase8 were incubated with IVTT, <sup>35</sup>S-methionine labeled, p22Bid cleavage reporter for the indicated periods of time at 30°C. The resulting cleavage of p22Bid was resolved by SDS-PAGE and monitored by autoradiography.

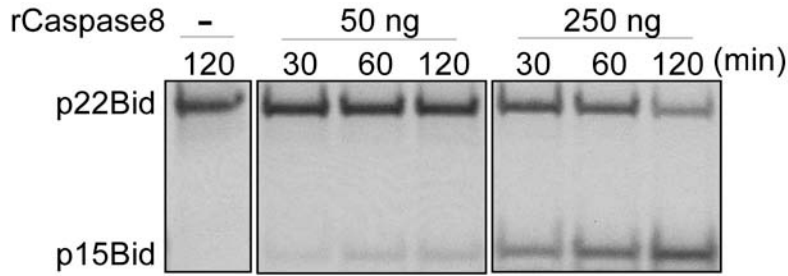

**Figure S2**

**Figure S3.** HTI-9 (ISQLAGVDD) is a competitive inhibitor of Taspase1. A, rTaspase1 was incubated with the indicated concentrations of HTI-9 for 30 minutes at room temperature. The IVTT, <sup>35</sup>S-methionine labeled, p75MLL cleavage reporter was then added to the enzyme (5ng rTaspase1)/HTI-9 mix for 30 minutes at 30°C. The resulting cleavage of p75MLL was resolved by SDS-PAGE and monitored by autoradiography. B, Increasing concentration of FRPR was incubated with 100 nM of rTaspase1 that was pretreated with the indicated concentrations of HTI-9 for 30 minutes at room temperature. The enzymatic cleavage was performed at 30°C and activity monitored by an LS55 spectrofluorometer. Data presented are mean  $\pm$  SD of three independent experiments.

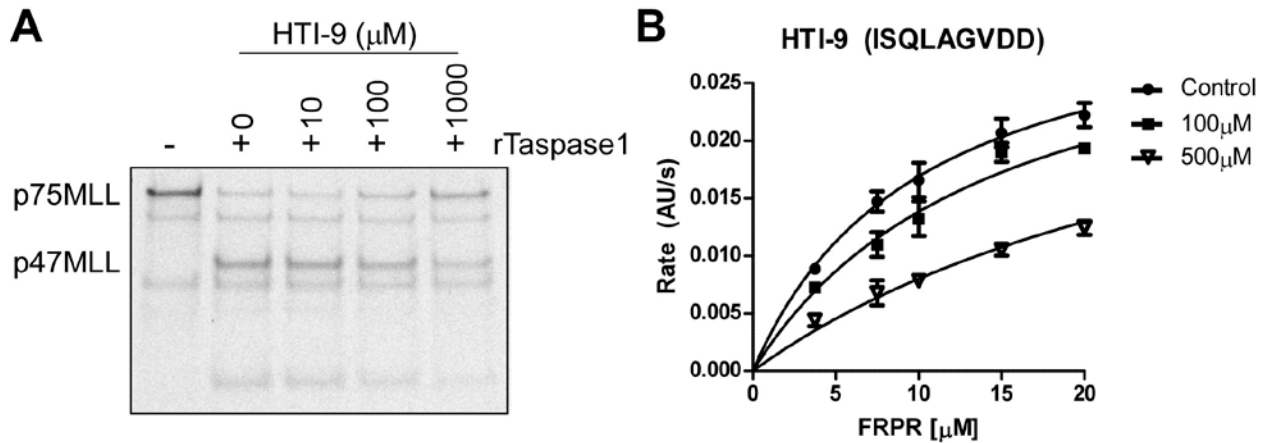

**Figure S3**

**Figure S4.** Precursor Taspase1 undergoes intramolecular but not intermolecular autoproteolysis to generate mature enzyme. IVTT, <sup>35</sup>S-methionine labeled, precursor Taspase1 (p50T1α-β) was incubated with the indicated amounts of rTaspase1 for 30 minutes at 30°C. The resulting cleavage was resolved by SDS-PAGE and monitored by autoradiography.

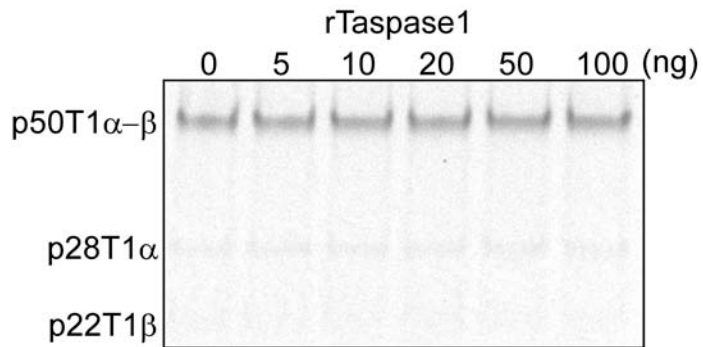

Figure S4

**Figure S5.** Histological examination of the indicated organs after treatment of NSC48300. Mice were treated with 2.5mg/kg of NSC48300 every other day through intravenous injections for a total of 5 doses. Organs were harvested one day after the last treatment, formalin-fixed, paraffin-embedded, sectioned, and stained by H&E. Scale bar equals 200μm.

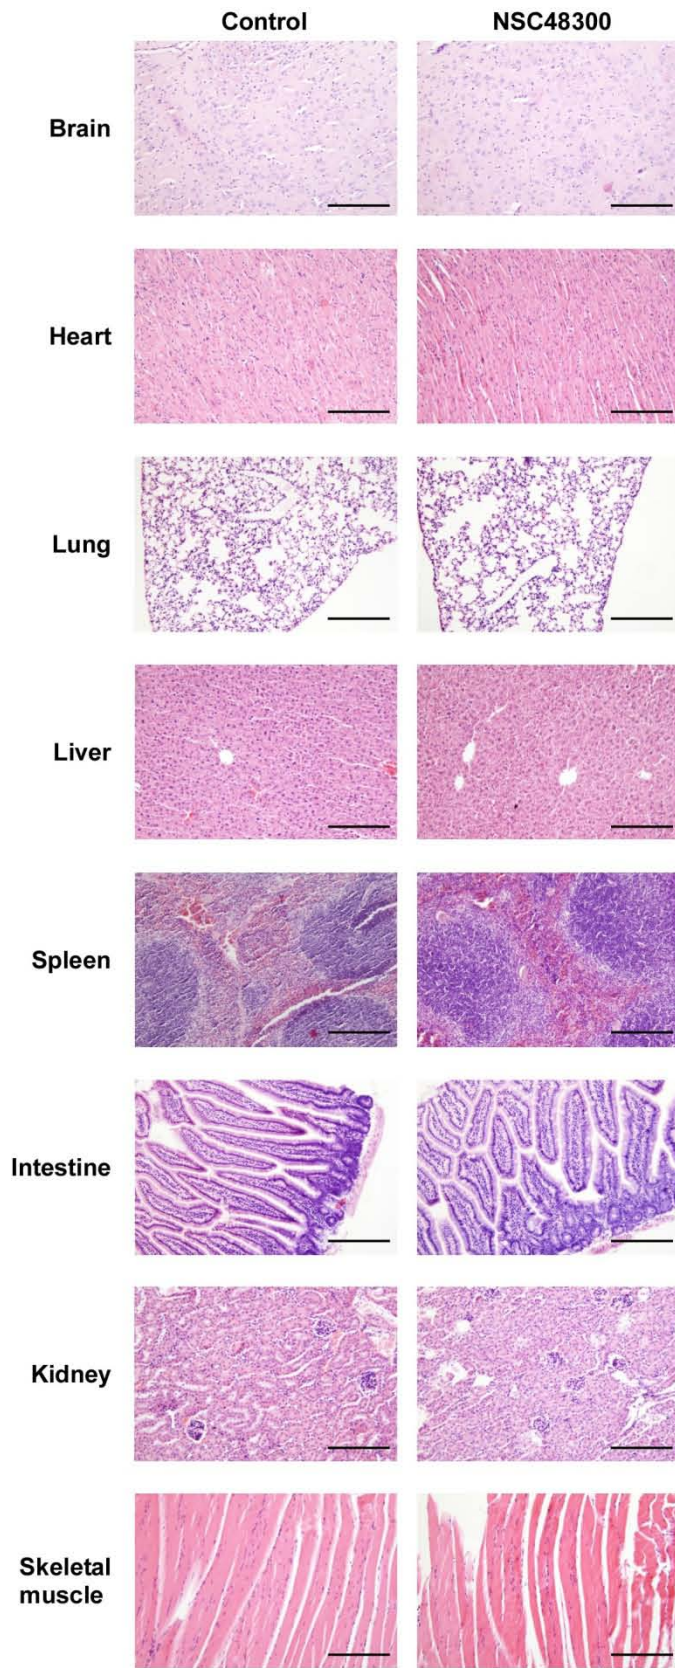

Figure S5

**Figure S6.** Hematological profiles after treatment with NSC48300. Mice were subjected to the same treatment as outlined in Figure S5. Blood was collected one day after last treatment and subjected to analysis using HEMAVET. Data are mean  $\pm$  SD of three animals in each arm. \*,  $P < 0.05$ . NSC denotes NSC48300.

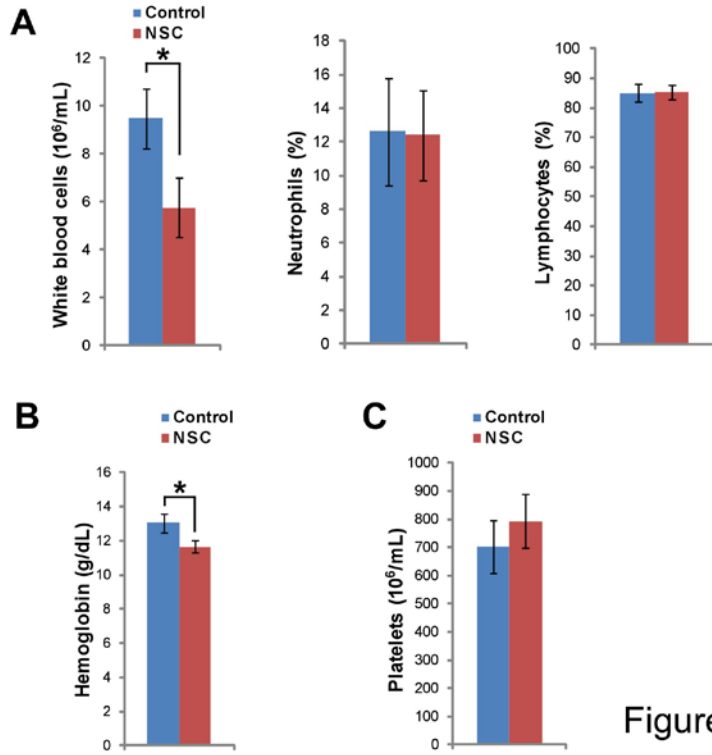

Figure S6

**Figure S7.** Knockdown of Taspase1 in the indicated breast cancer cell lines. The protein levels were determined by Western blots using the indicated antibodies.

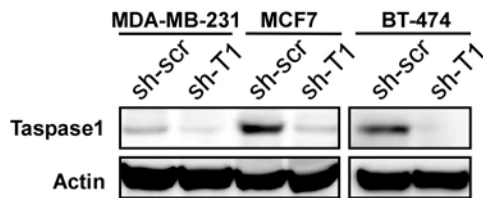

Figure S7

**Table S1.** Identities of compounds #1-#7 tested in Figure 3.

|    | PLATEKEY | PLATE | SUFFIX | WELLID | WELLNBR | NSC    |
|----|----------|-------|--------|--------|---------|--------|
| #1 | 3847048  | 3847  | 48     | G07    | 79      | 7215   |
| #2 | 3855048  | 3855  | 48     | A08    | 8       | 339585 |
| #3 | 3859048  | 3859  | 48     | G02    | 74      | 163443 |
| #4 | 3860059  | 3860  | 59     | A02    | 2       | 48300  |
| #5 | 3863048  | 3863  | 48     | G11    | 83      | 118176 |
| #6 | 3865048  | 3865  | 48     | B05    | 17      | 172033 |
| #7 | 3865048  | 3865  | 48     | H08    | 92      | 402959 |

Table S1

**Table S2.** Summary of Taspase1 protein expression and the NSC48300 sensitivity based on published and publically available databases.



| Cell line      | GD2006 T1/Actin | NSC48300 10-09 |         |          |
|----------------|-----------------|----------------|---------|----------|
|                |                 | log GI50       | log TGI | log LC50 |
| BR:HS578T      | 1.05            | -5.876         | -4.908  | -4       |
| BR:BT_549      | 1.35            | -5.928         | -5.51   | -5.092   |
| BR:MDA_MB_231  | 1.39            | -5.996         | -5.639  | -5.297   |
| BR:T47D        | 4.58            | -6.506         | -5.727  | -4.625   |
| BR:MCF7        | 5.72            | -6.546         | -5.925  | -5.443   |
| CNS:SF_295     | 1.30            | -5.556         | -5.073  | -4.443   |
| CNS:SF_268     | 1.69            | -6.364         | -5.732  | -5.192   |
| CNS:SNB_75     | 1.77            | -5.874         | -5.507  | -5.139   |
| CNS:SF_539     | 2.34            | -6.715         | -6.266  | -5.795   |
| CNS:SNB_19     | 3.97            | -5.939         | -5.578  | -5.216   |
| CNS:U251       | 4.38            | -6.431         | -5.82   | -5.407   |
| CO:HCT_15      | 3.37            | -5.932         | -5.54   | -5.103   |
| CO:KM12        | 4.13            | -5.719         | -5.264  | -4.619   |
| CO:COLO205     | 4.34            | -6.21          | -5.722  | -5.359   |
| CO:SW_620      | 4.38            | -6.569         | -5.662  | -4.169   |
| CO:HT29        | 4.45            | -6.109         | -5.623  | -5.19    |
| CO:HCT_116     | 6.41            | -6.048         | -5.671  | -5.335   |
| CO:HCC_2998    | 7.50            | -5.719         | -5.434  | -5.149   |
| LE:K_562       | 0.20            | -6.576         | -5.434  | -4       |
| LE:SR          | 0.91            | -6.57          | -5.967  | -4       |
| LE:CCRF_CEM    | 1.96            | -7.09          | -5.978  | -4       |
| LE:HL_60       | 4.34            | -5.963         | -5.4    | -4       |
| LE:RPMI_8226   | 5.23            | -6.546         | -6.007  | -4       |
| LE:MOLT_4      | 6.07            | -6.34          | -5.371  | -4       |
| ME:LOXIMVI     | 3.23            | -6.474         | -5.85   | -5.373   |
| ME:UACC_257    | 3.61            | -6.199         | -5.887  | -5.431   |
| ME:MDA_MB_435  | 4.00            | -5.892         | -5.625  | -5.099   |
| ME:MALME_3M    | 4.46            | -5.922         | -5.582  | -5.242   |
| ME:SK_MEL_5    | 5.50            | -5.878         | -5.724  | -5.352   |
| MEM14          | 6.99            | -5.975         | -5.609  | -5.268   |
| ME:UACC_62     | 9.37            | -6.302         | -5.581  | -5.28    |
| ME:SK_MEL_28   | 9.86            | -5.871         | -5.535  | -5.191   |
| ME:SK_MEL_2    | 15.35           | -6.239         | -5.542  | -5.213   |
| MEMDA_N        |                 | -6.376         | -5.783  | -5.328   |
| LC:NCI_H226    | 1.29            | -5.422         | -5.114  | -4.591   |
| LC:HOP_92      | 1.71            | -5.823         | -5.535  | -5.246   |
| LC:NCI_H23     | 2.66            | -6.113         | -5.646  | -5.241   |
| LC:NCI_H522    | 3.46            | -6.378         | -5.841  | -5.346   |
| LC:HOP_62      | 4.47            | -5.883         | -5.444  | -4.99    |
| LC:EKVX        | 5.00            | -5.946         | -5.541  | -5.163   |
| LC:NCI_H322M   | 7.48            | -5.531         | -5.022  | -4.51    |
| LC:A549        | 8.05            | -5.742         | -5.419  | -5.096   |
| LC:NCI_H460    | 8.41            | -6.041         | -5.614  | -5.239   |
| OV:IGROV1      | 1.72            | -6.16          | -5.711  | -5.309   |
| OV:NCI_ADR_RES | 2.03            | -5.831         | -5.168  | -4       |
| OV:OVCAR_5     | 2.41            | -5.631         | -5.332  | -5.02    |
| OV:SK_OV_3     | 2.42            | -5.668         | -5.208  | -4.789   |
| OV:OVCAR_8     | 3.49            | -6.446         | -5.871  | -5.397   |
| OV:OVCAR_4     | 6.49            | -5.722         | -5.127  | -4.358   |
| OV:OVCAR_3     | 6.70            | -6.076         | -5.578  | -5.107   |
| PR:DU_145      | 3.80            | -6.474         | -5.932  | -5.396   |
| PR:PC_3        | 4.04            | -6.263         | -5.755  | -5.376   |
| RE:A498        | 2.84            | -5.674         | -5.402  | -5.131   |
| RE:786_0       | 3.25            | -6.449         | -5.889  | -5.442   |
| RE:RXF_393     | 3.48            | -6.384         | -5.815  | -5.327   |
| RE:SN12C       | 4.25            | -6.194         | -5.681  | -5.238   |
| RE:UO_31       | 4.45            | -5.907         | -5.58   | -5.254   |
| RE:CAK1_1      | 4.72            | -6.02          | -5.555  | -5.065   |
| RE:TK_10       | 5.28            | -6.262         | -5.895  | -5.463   |
| RE:ACHN        | 5.90            | -5.986         | -5.636  | -5.318   |

Table S2

**Table S3.** Serum chemistry of mice post-NSC48300 treatment. Mice were subjected to the same treatment as outlined in Figure S5. Serum was collected one day after last treatment and subjected to analysis. Data are mean and (SD) of three animals from each arm. NSC denotes NSC48300.

|                | GLU           | BUN        | CREAT       | LDH            | AMYL            | ALP          | ALT           | AST           | T. BILI   |
|----------------|---------------|------------|-------------|----------------|-----------------|--------------|---------------|---------------|-----------|
|                | mg/dL         | mg/dL      | mg/dL       | U/L            | U/L             | U/L          | U/L           | U/L           | mg/dL     |
| Control        | 464.0 (110.9) | 24.0 (5.3) | 0.23 (0.1)  | 2470.0 (887.6) | 4280.5 (1034.5) | 199.3 (70.0) | 79.3 (24.3)   | 213.3 (35.9)  | 0.9 (0.3) |
| 2.5mg/kg (NSC) | 408.7 (58.1)  | 25.0 (7.2) | 0.30 (0)    | 1145.0 (367.0) | 4645.7 (1033.9) | 228.7 (37.6) | 109.67 (51.4) | 157.67 (94.0) | 1.0 (0.1) |
| p-value        | 0.508         | 0.885      | 0.184       | 0.048          | 0.816           | 0.355        | 0.201         | 0.522         | 0.580     |
|                |               |            |             |                |                 |              |               |               |           |
|                | Na+           | K+         | Cl-         |                |                 |              |               |               |           |
|                | mmol/L        | mmol/L     | mmol/L      |                |                 |              |               |               |           |
| Control        | 148.7 (8.6)   | 11.4 (3.4) | 117.3 (2.5) |                |                 |              |               |               |           |
| 2.5mg/kg (NSC) | 131.3 (5.1)   | 8.0 (0.8)  | 103.7 (4.0) |                |                 |              |               |               |           |
| p-value        | 0.156         | 0.187      | 0.053       |                |                 |              |               |               |           |

Table S3
